# Supplementary material
Source: publisher site journal article supplement (https://en-cdn.bio-protocol.org/attached/file/20200616/Supplementary%20Table%20S1.docx)
Supplement: Supplementary file 1 [file Supplementary%20Table%20S1.docx]

**Table S1.** Comparison of our results for BMock12 with those reported by Sevim *et al*. (2019). The first column (“Assemblies [Sevim *et al.*, 2019]”) shows the BMock12 species that Sevim and colleagues were able to obtain assemblies for, and the second column (“No. contigs [Sevim *et al.*, 2019]”) indicates the number of contigs that were assigned to each of those species. The third column (“Taxa identified by HoSeIn”) shows the taxa that were identified by our workflow up to genus (lighter grey) and species taxonomic levels (darker grey), and the last column (“No. contigs [HoSeIn]”) shows the number of contigs that were assigned by our workflow to each of those taxa.

| **Assemblies (Sevim *et al.*, 2019)** | **No. contigs (Sevim *et al.*, 2019)** | **Taxa identified by HoSeIn** | **No. contigs (HoSeIn)** |
| --- | --- | --- | --- |
|  |  | Genus *Muricauda* | 123 |
| *Muricauda* sp. ES.050 | 3 | *Muricauda* sp. ES.050 | 7 |
|  |  | Genus *Thioclava* | 13 |
| *Thioclava* sp. ES.032 | 3 | *Thioclava* sp. ES.032 | 3 |
| *Cohaesibacter* sp. ES.047 | 23 | *Cohaesibacter* sp. ES.047 | 82 |
| Propionibacteriaceae bacterium ES.041 | 2 | Genus *Cutibacterium* (Propionibacteriaceae) | 1 |
|  |  | unclassified Propionibacteriaceae | 1 |
|  |  | Genus *Marinobacter* | 172 |
| *Marinobacter* sp. LV10R510**-8** | 11 | *Marinobacter* sp. | 62 |
| *Marinobacter* sp. LV10MA510-1 | 20 |  |  |
|  |  | Genus *Psychrobacter* | 414 |
| *Psychrobacter* sp. LV10R520-6 | 41 | *Psychrobacter* sp. | 15 |
| *Micromonospora echinaurantiaca* DSM 43904 | 6 | *Micromonospora echinaurantiaca* | 9 |
| *Micromonospora echinofusca* DSM 43913 | 5 | *Micromonospora echinofusca* | 11 |
|  |  | Genus *Halomonas* | 1134 |
| *Halomonas* sp. HL-4 | 56 | *Halomonas* sp. HL-4 | 58 |
| *Halomonas* sp. HL-93 | 43 | *Halomonas* sp. HL-93 | 60 |
| Not aligned | 239 | No hits (331) + not assigned (15) | 346 |
| **Total** | **452** | **Total (assigned+no hits+not assigned)** | **2714** |
